# Supplementary figures and images for: Handover management in high-dense femtocellular networks
Source: Springer Nature journal article supplement (doi:10.1186/1687-1499-2013-6), 2013-01-07

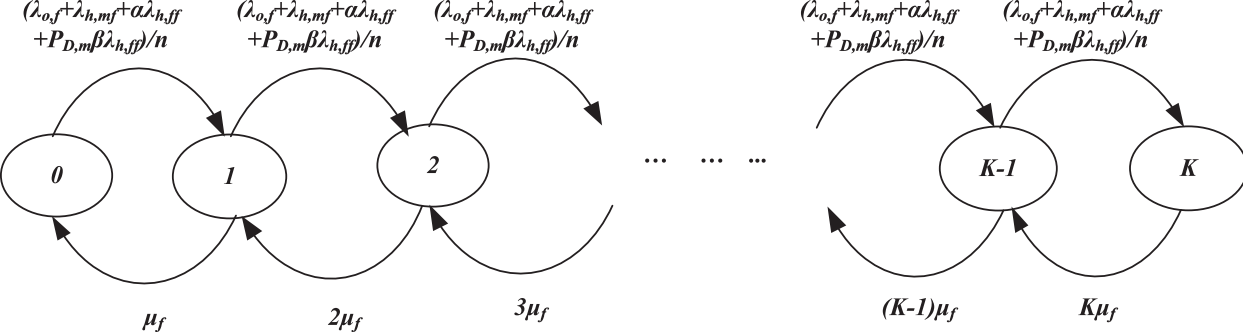

Supplement: 13638_2011_568_MOESM12_ESM.pdf [file 13638_2011_568_MOESM12_ESM.pdf]

Channel release rate in macrocell

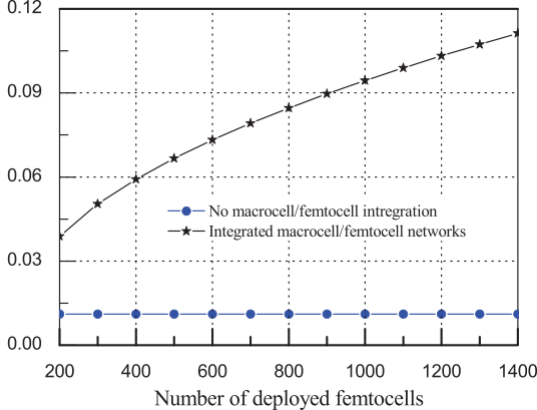

Supplement: 13638_2011_568_MOESM18_ESM.pdf [file 13638_2011_568_MOESM18_ESM.pdf]
